# Supplementary material for: Rational synthesis of microporous carbons for enhanced post-combustion CO2 capture via non-hydroxide activation of air carbonised biomass
Source: Royal Society of Chemistry journal article supplement (doi:10.1039/d2ra02661a), 2022-01-01
Supplement: d2ra02661a1.pdf [file d2ra02661a1.pdf]

*Supporting Information*

**Rational synthesis of microporous carbons for enhanced post-combustion CO<sub>2</sub> capture via non-hydroxide activation of air carbonised biomass**

Afnan Altwala<sup>a,b</sup>, and Robert Mokaya<sup>a\*</sup>

<sup>a</sup>School of Chemistry, University of Nottingham, University Park, Nottingham NG7 2RD, U. K.

<sup>b</sup>Department of Chemistry, College of Science Al-Zulfi, Majmaah University, Al-Majmaah, 11952, Saudi Arabia

*E-mail: r.mokaya@nottingham.ac.uk (R. Mokaya)*

Table S1. Yield and elemental composition of KOH activated carbons derived from ACDS carbon.

| Sample      | Yield [wt %] | C [%] | H [%] | N [%] | O [%] |
|-------------|--------------|-------|-------|-------|-------|
| Date seed   |              | 49.0  | 7.0   | 1.6   | 42.4  |
| ACDS carbon |              | 78.5  | 4.0   | 1.2   | 16.3  |
| ACDS2700    | 60           | 82.0  | 0.9   | 0.5   | 16.6  |
| ACDS2800    | 56           | 90.0  | 0.1   | 0.2   | 9.7   |
| ACDS4700    | 54           | 83.9  | 0.2   | 0.3   | 15.6  |
| ACDS4800    | 50           | 84.3  | 0.1   | 0.1   | 15.5  |
| ACDS2700P   | 58           | 81.4  | 1.1   | 0.3   | 17.2  |
| ACDS2800P   | 54           | 83.3  | 0.1   | 0.2   | 16.4  |
| ACDS4700P   | 48           | 82.0  | 0.7   | 0.2   | 17.1  |
| ACDS4800P   | 46           | 84.5  | 0.1   | 0.3   | 15.1  |

Table S2. Textural properties of KOH activated and compactivated carbons derived from ACDS carbon

| Sample    | Surface area<br>(m <sup>2</sup> g <sup>-1</sup> ) | Micropore surface area <sup>a</sup><br>(m <sup>2</sup> g <sup>-1</sup> ) | Pore volume<br>(cm <sup>3</sup> g <sup>-1</sup> ) | Micropore volume <sup>b</sup><br>(cm <sup>3</sup> g <sup>-1</sup> ) | Pore size (Å)       |
|-----------|---------------------------------------------------|--------------------------------------------------------------------------|---------------------------------------------------|---------------------------------------------------------------------|---------------------|
| ACDS2700  | 1264                                              | 1170 (92)                                                                | 0.53                                              | 0.47 (88)                                                           | 8.5                 |
| ACDS4700  | 2192                                              | 1871 (85)                                                                | 0.93                                              | 0.74 (79)                                                           | 5.5/8/9/11.5        |
| ACDS2800  | 2068                                              | 1780 (86)                                                                | 0.88                                              | 0.71 (80)                                                           | 6/9.2/11.7/14.5     |
| ACDS4800  | 2609                                              | 1825 (70)                                                                | 1.10                                              | 0.70 (63)                                                           | 5.5/8/10/16/20      |
| ACDS2700P | 2051                                              | 1846 (90)                                                                | 0.88                                              | 0.75 (85)                                                           | 6/9/11.8            |
| ACDS4700P | 2450                                              | 1962 (80)                                                                | 1.05                                              | 0.77 (73)                                                           | 5.8/8/10/11.8/16    |
| ACDS2800P | 2357                                              | 1889 (80)                                                                | 1.06                                              | 0.75 (71)                                                           | 6/8.5/12.5/16       |
| ACDS4800P | 2738                                              | 1793 (65)                                                                | 1.21                                              | 0.69 (57)                                                           | 5.8/8/10/11.8/16/20 |

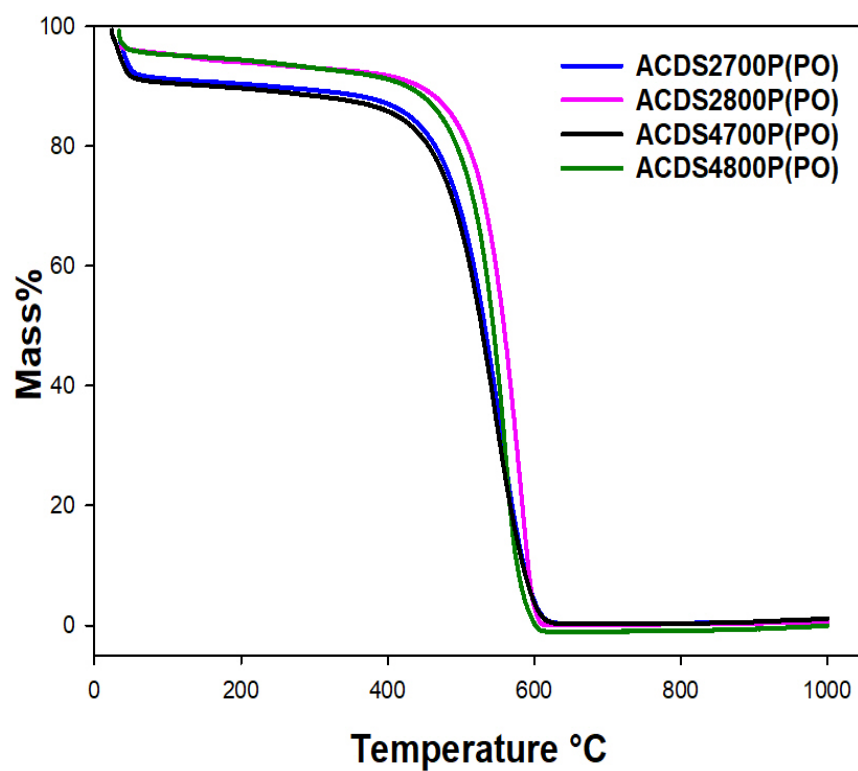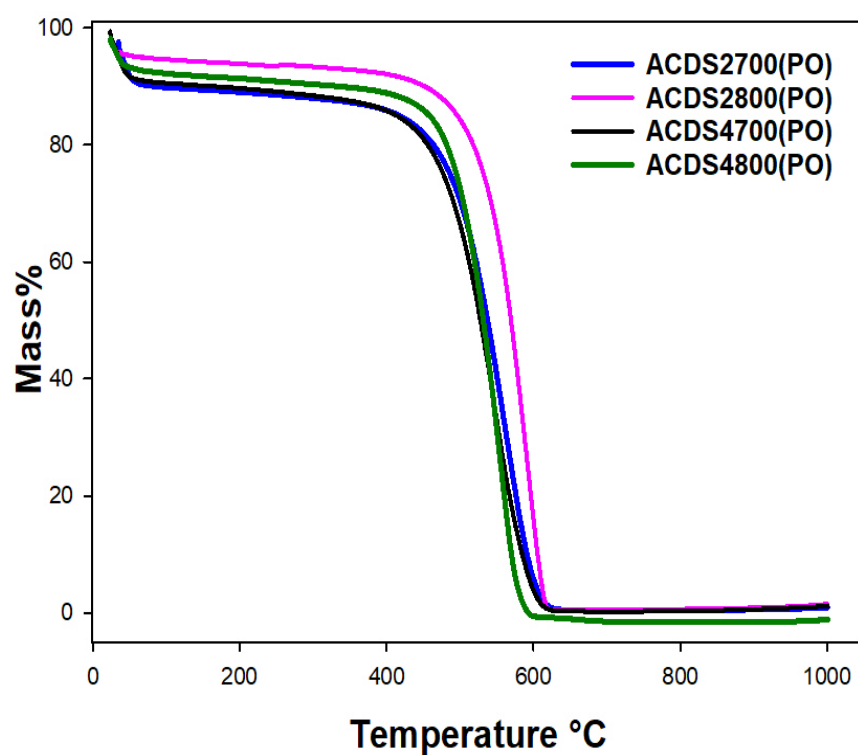

Figure S1. Thermogravimetric analysis curves of PO activated carbons derived from ACDS carbon.

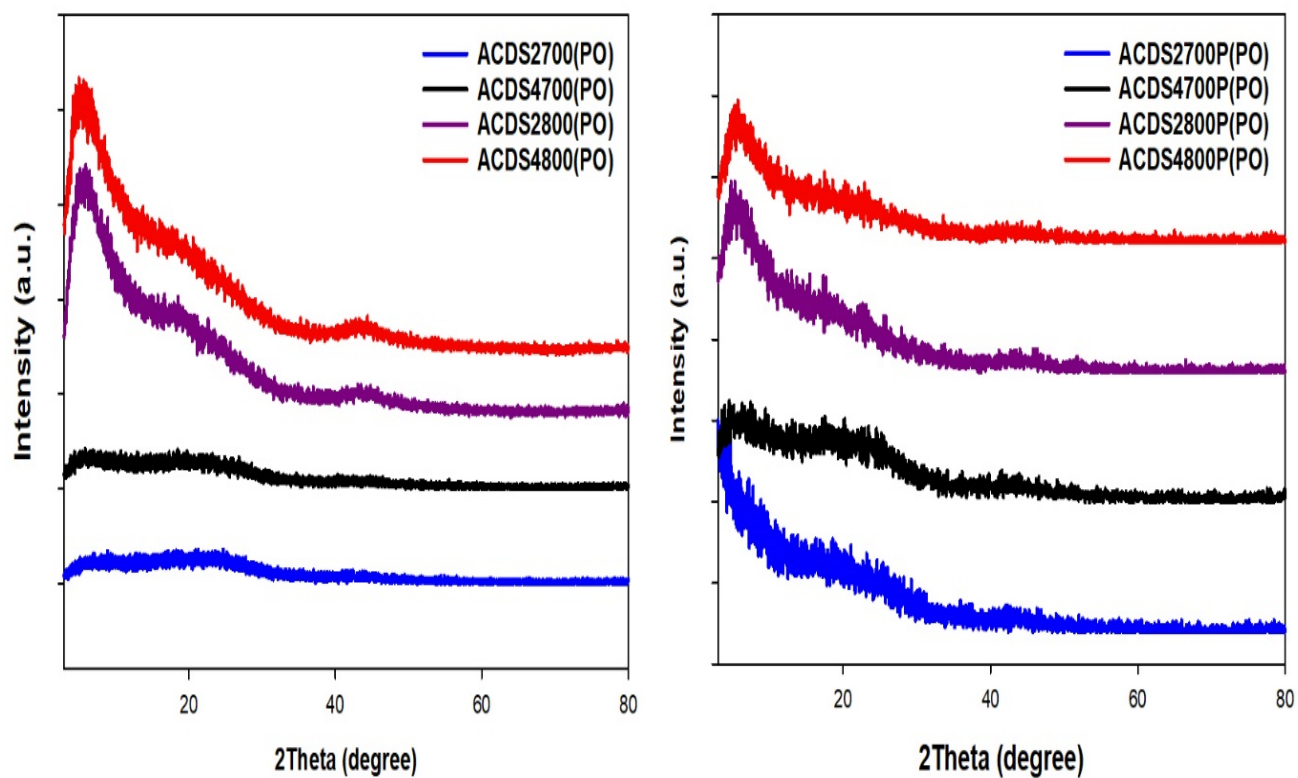

Figure S2. Powder XRD patterns of PO activated carbons derived from ACDS carbon.

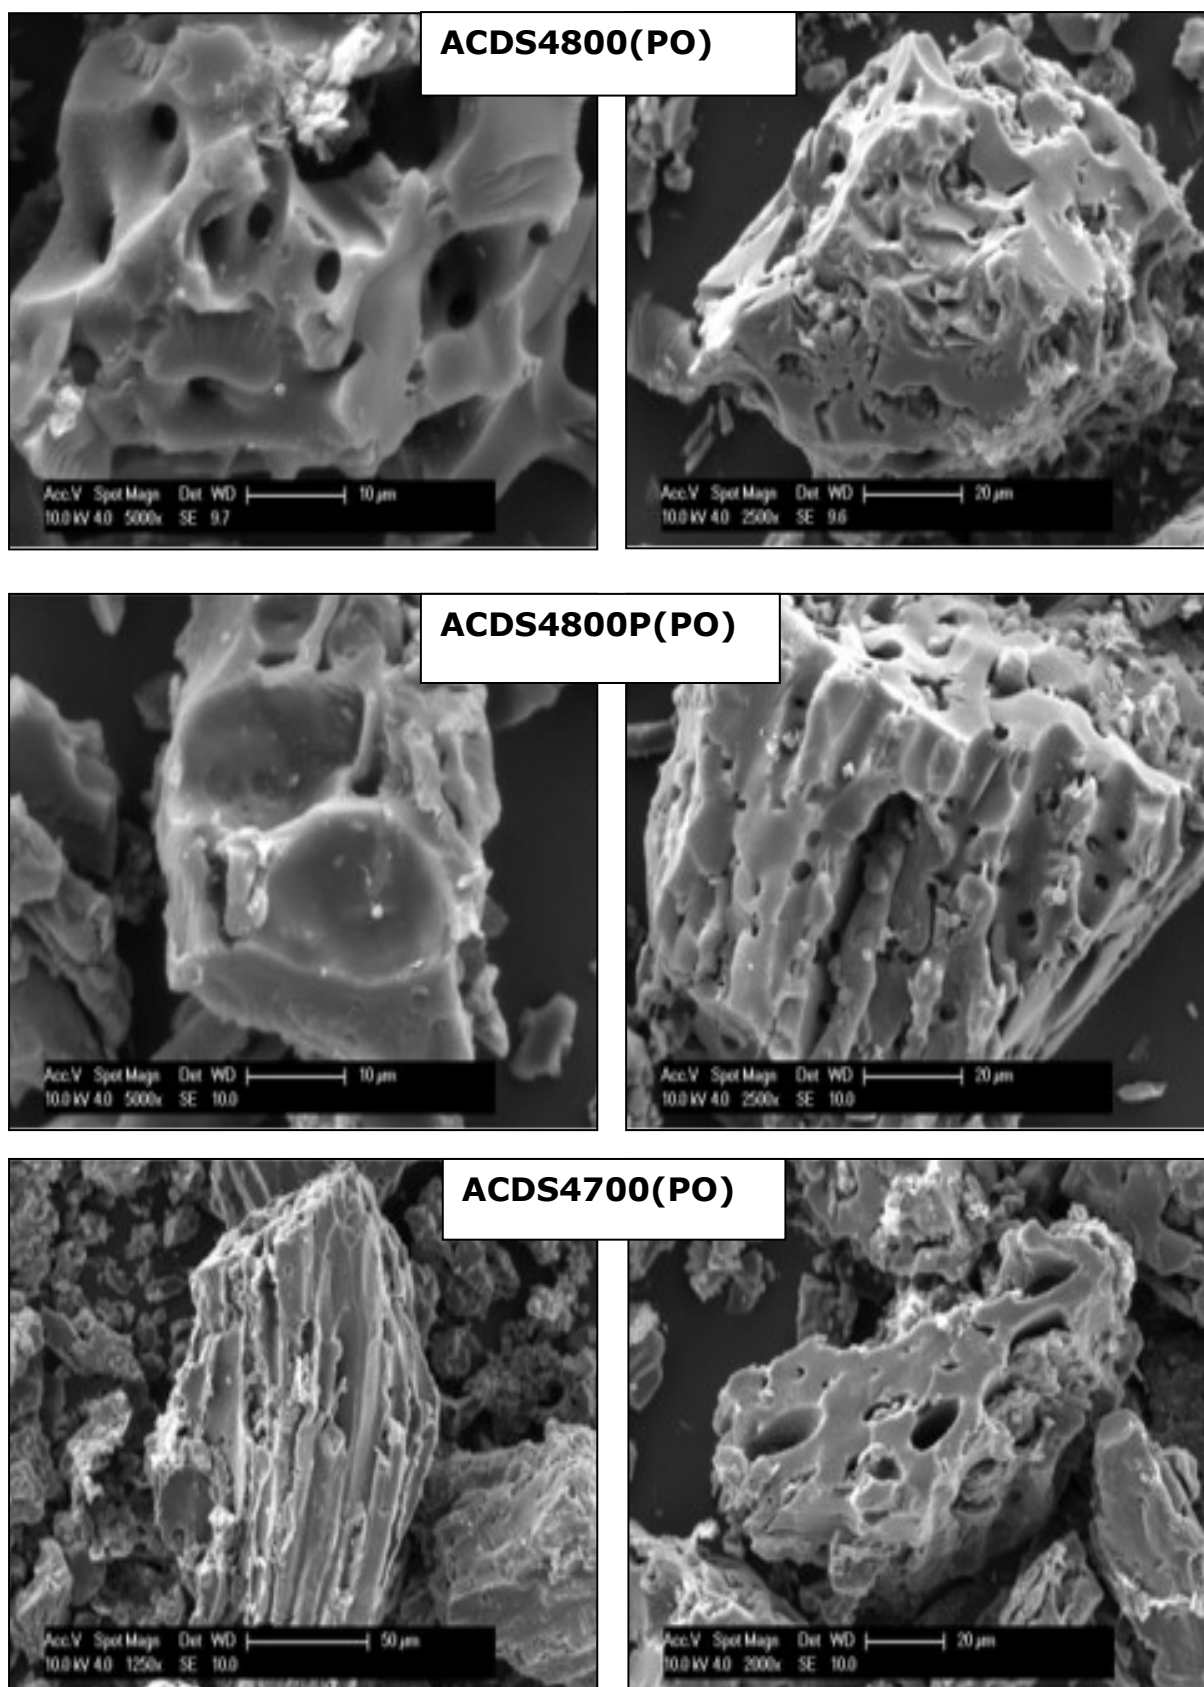

Figure S3. SEM images of PO activated carbons derived from ACDS carbon.



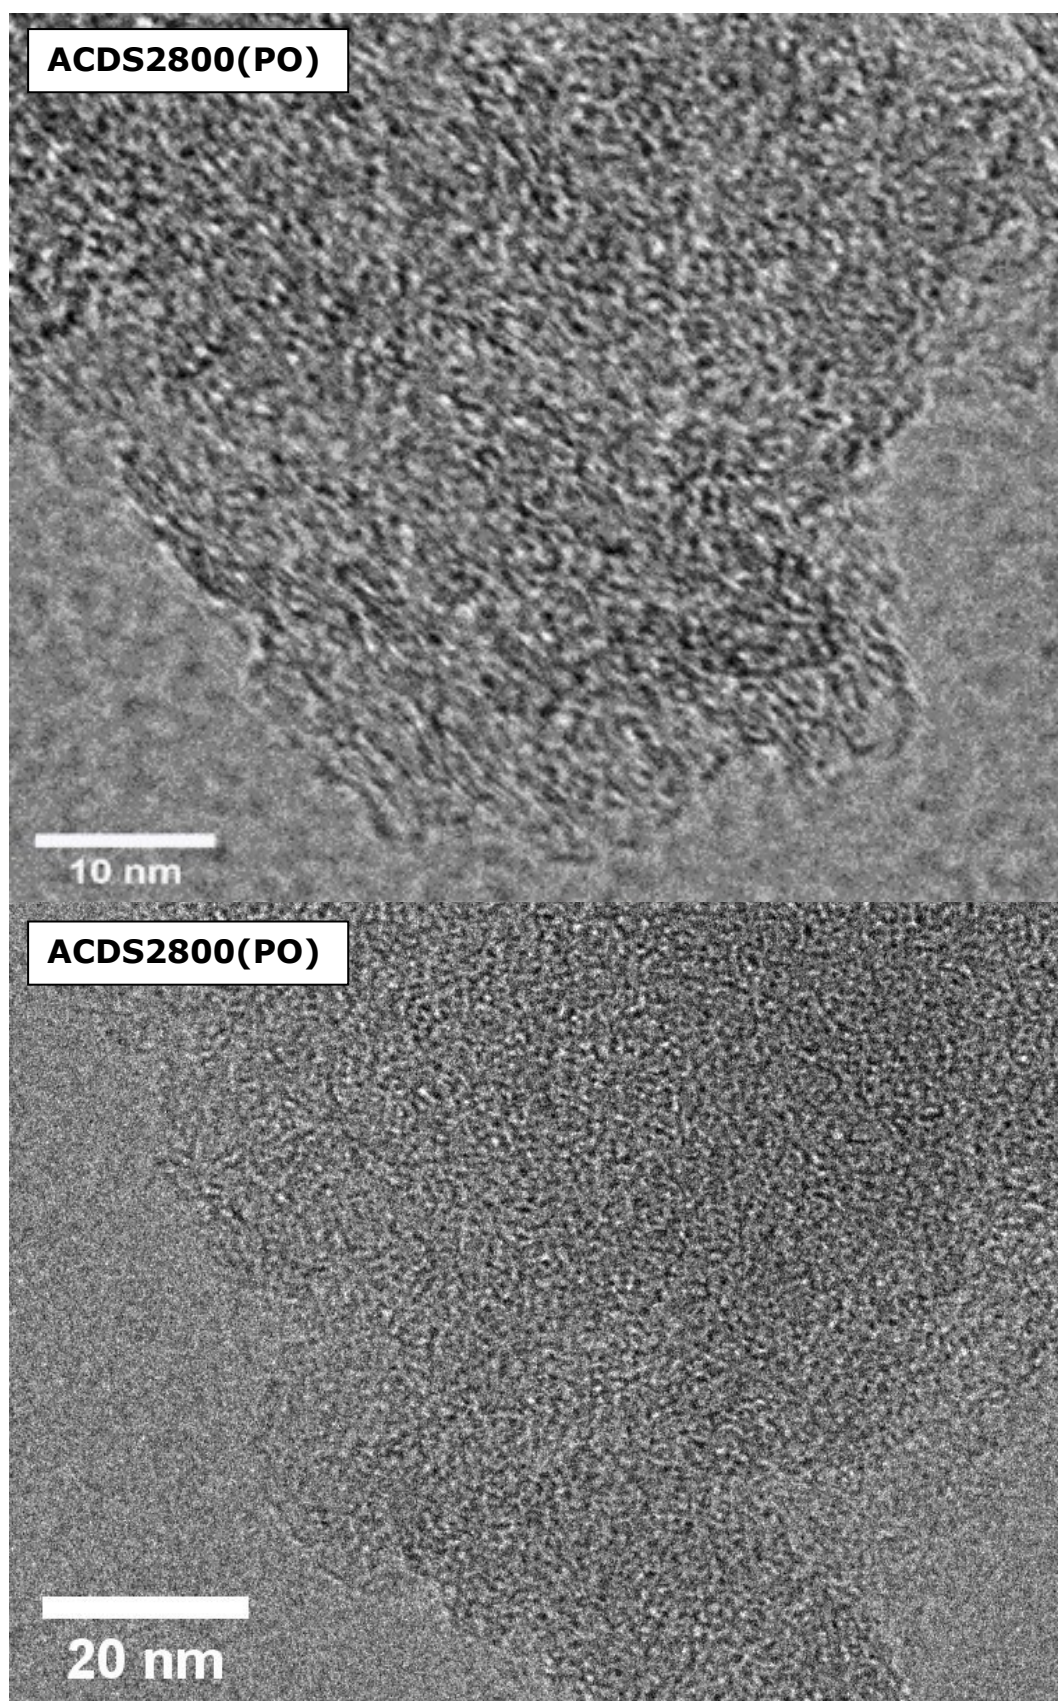

Figure S4. Representative TEM images of sample ACDS2800(PO).

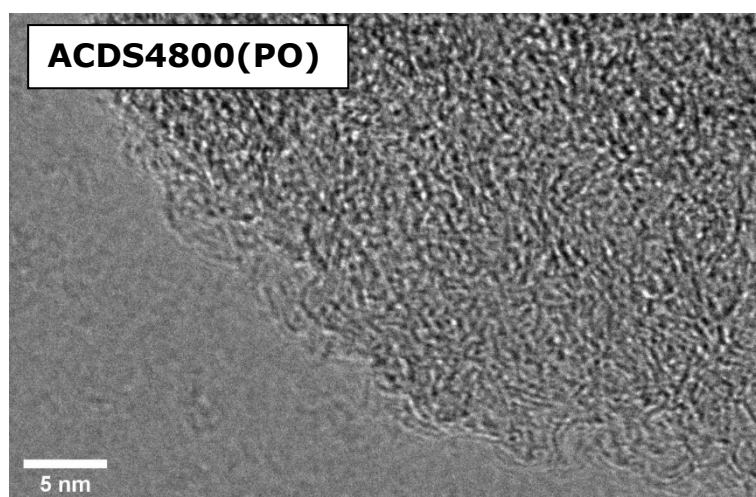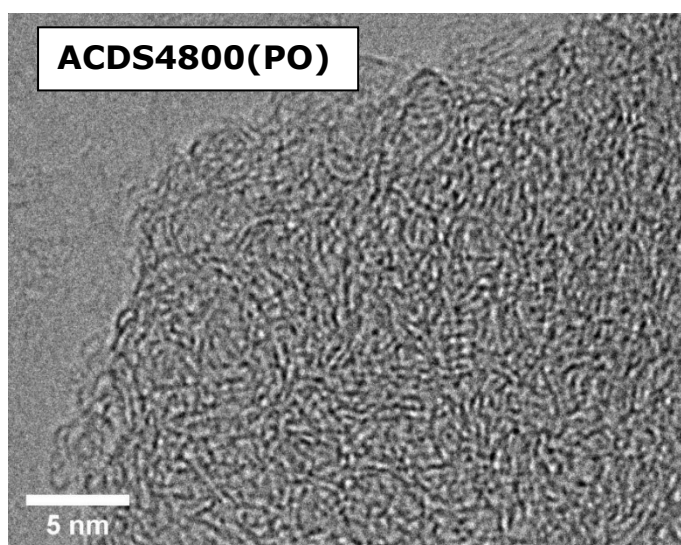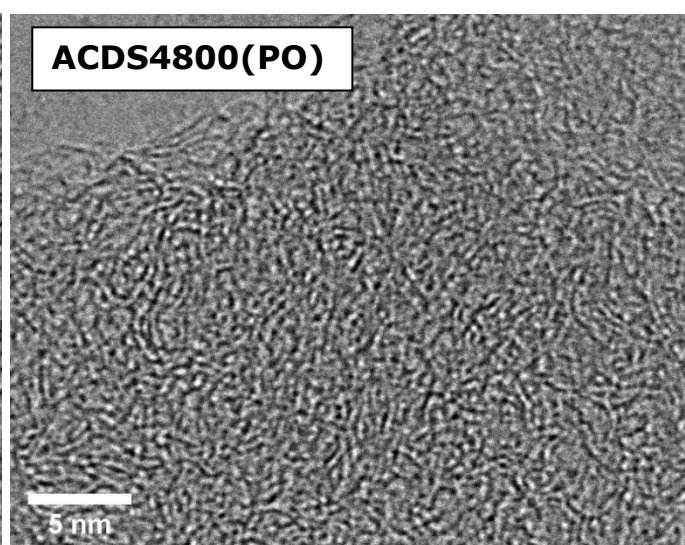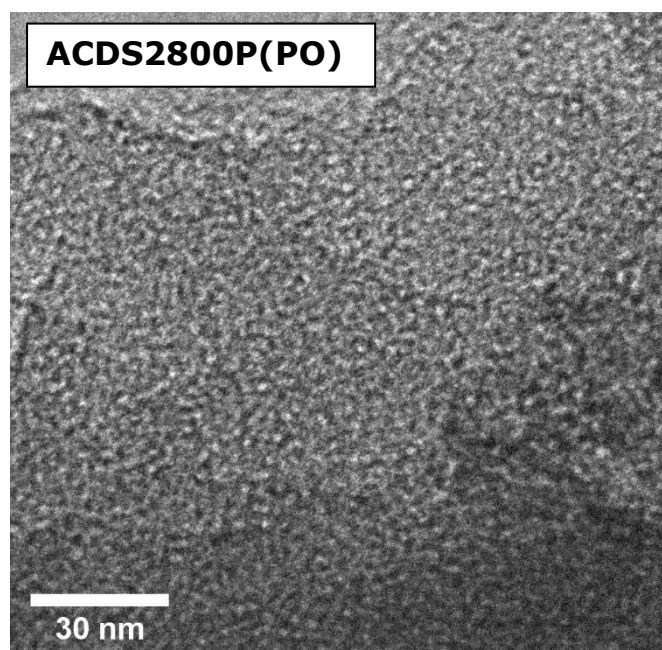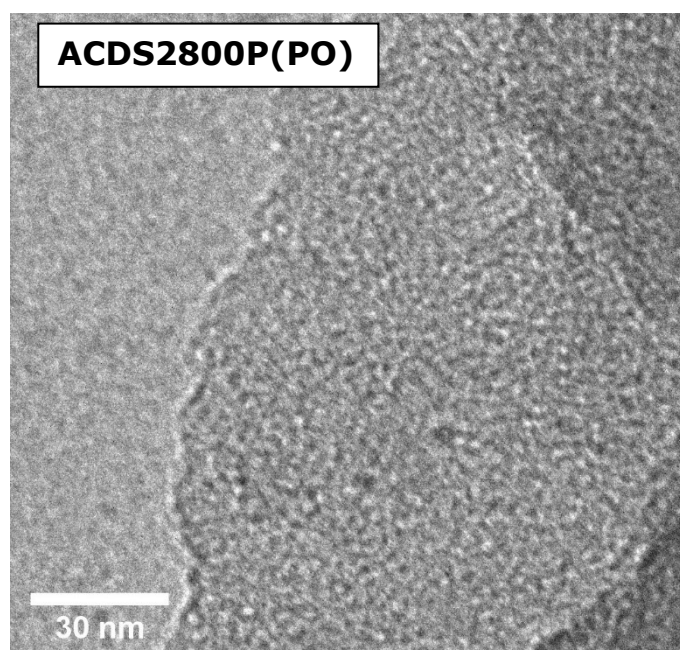

Figure S5. Representative TEM images of sample ACDS4800(PO) and ACDS4800P(PO).



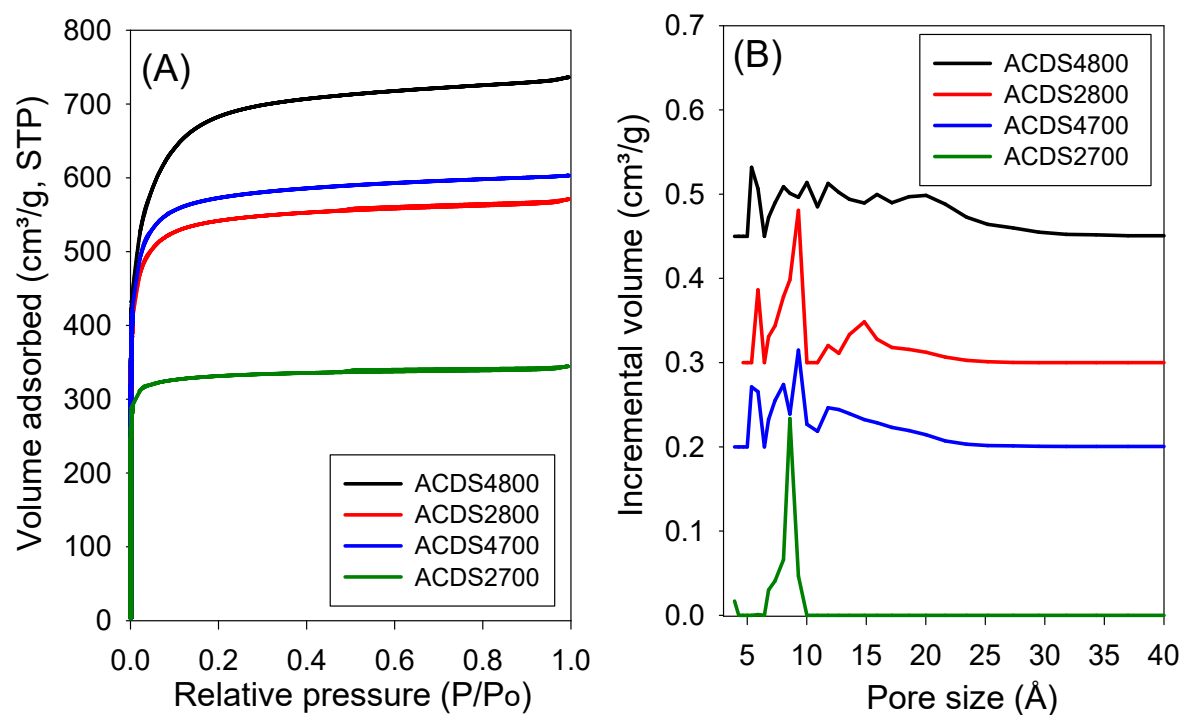

Figure S6. Nitrogen sorption isotherms (A) and pore size distribution curves (B) of KOH activated carbons derived from powdered ACDS carbon.

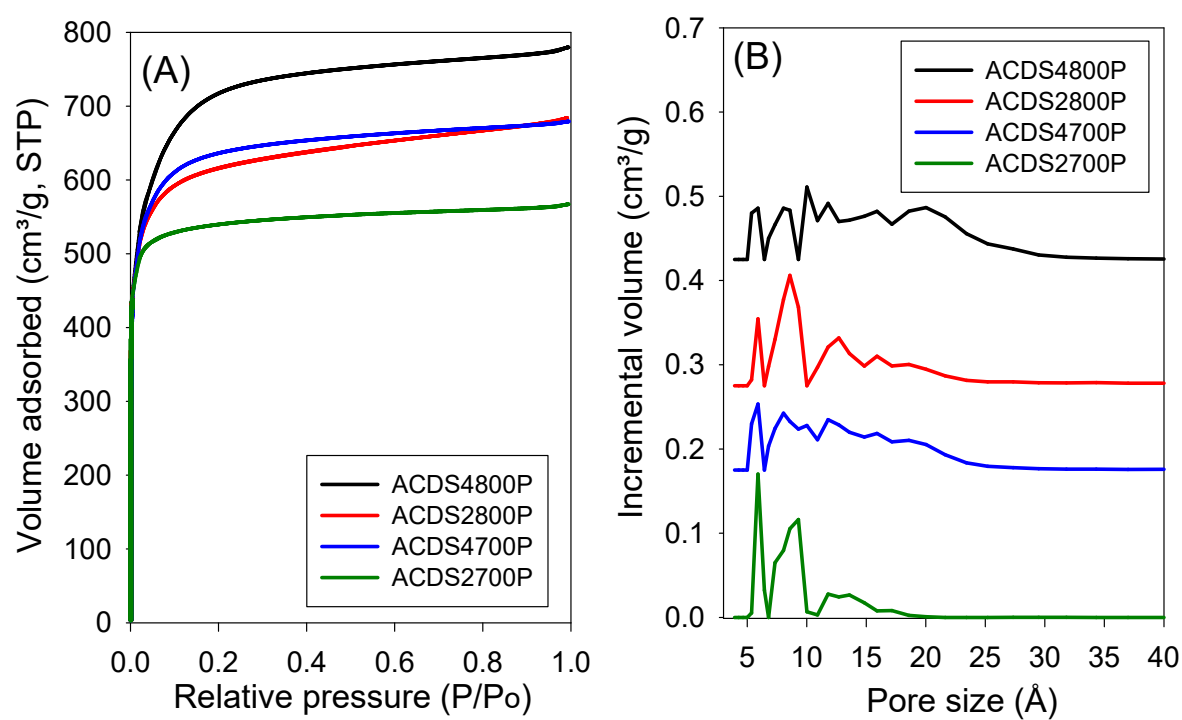

Figure S7. Nitrogen sorption isotherms (A) and pore size distribution curves (B) of KOH compactivated carbons derived from compacted ACDS carbon.

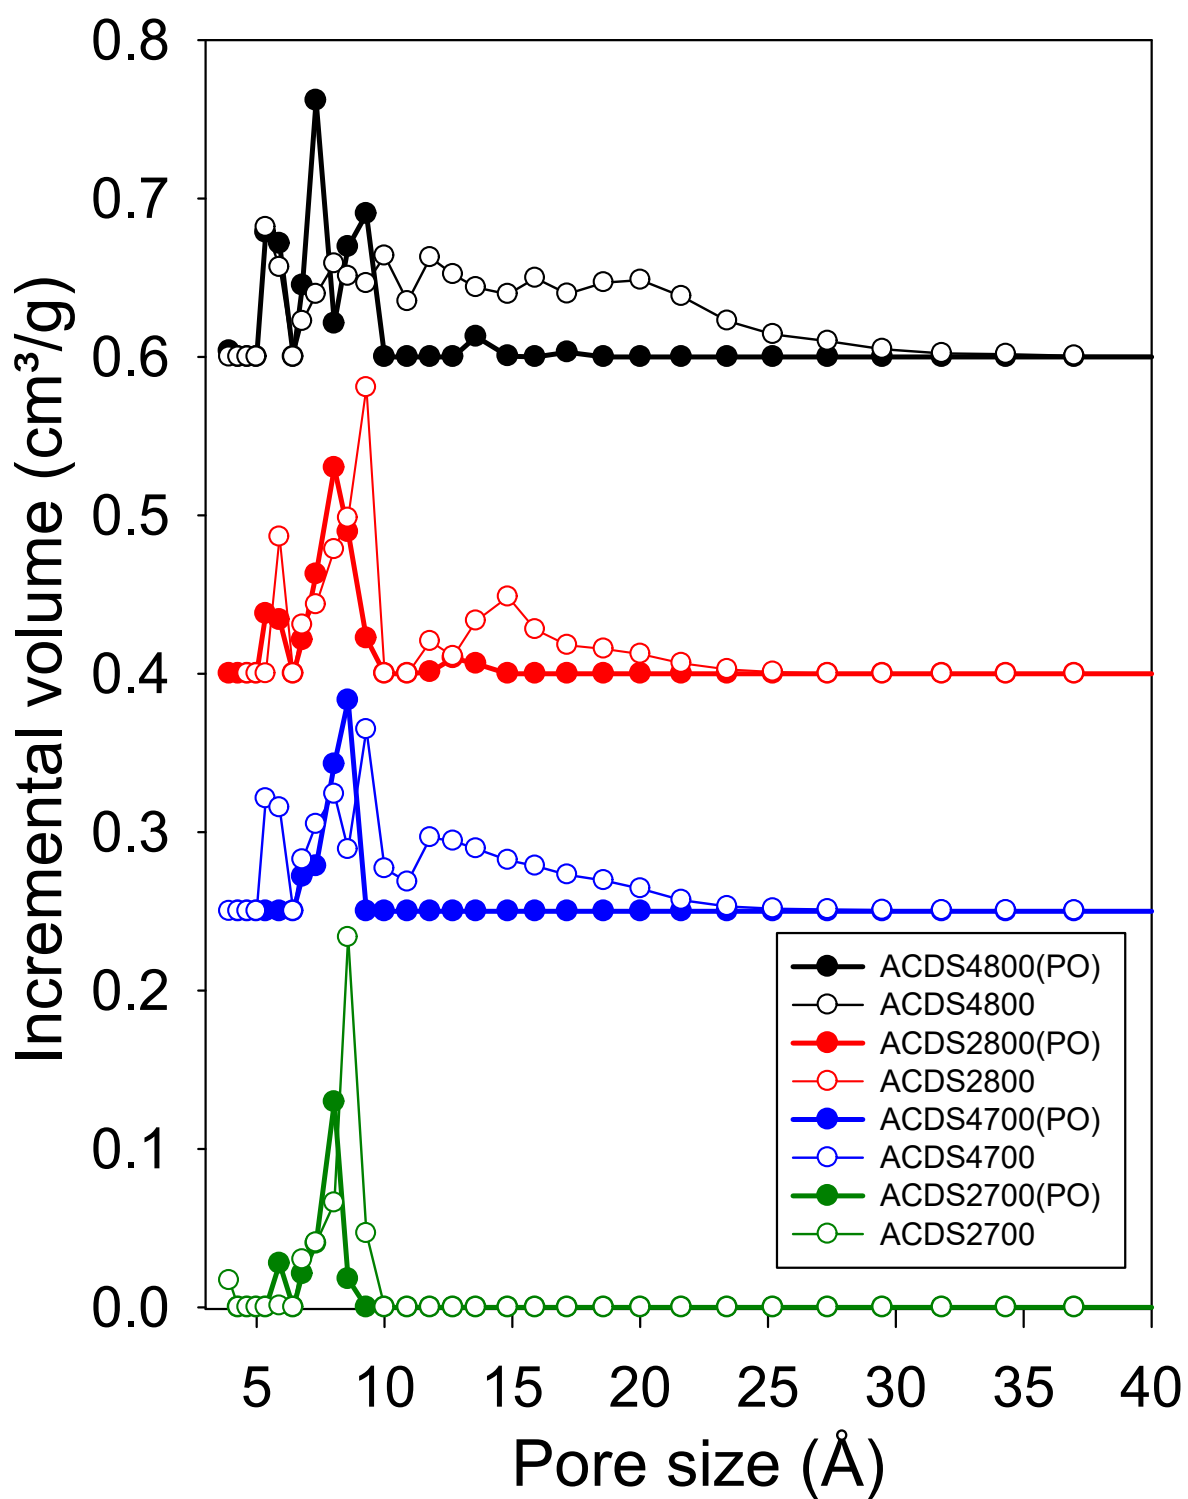

Figure S8. Pore size distribution curves of PO and KOH activated carbons derived from powder ACDS carbon.

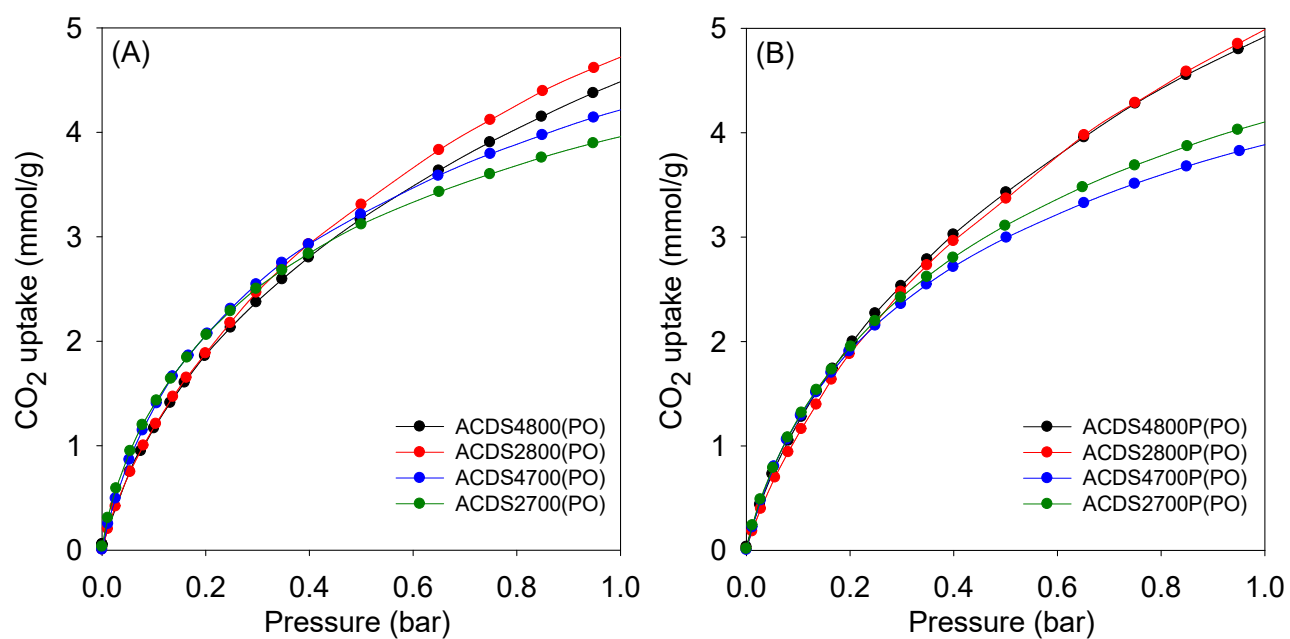

Figure S9. CO<sub>2</sub> uptake of PO activated carbons derived from (A) powdered or (B) compacted ACDS carbon.

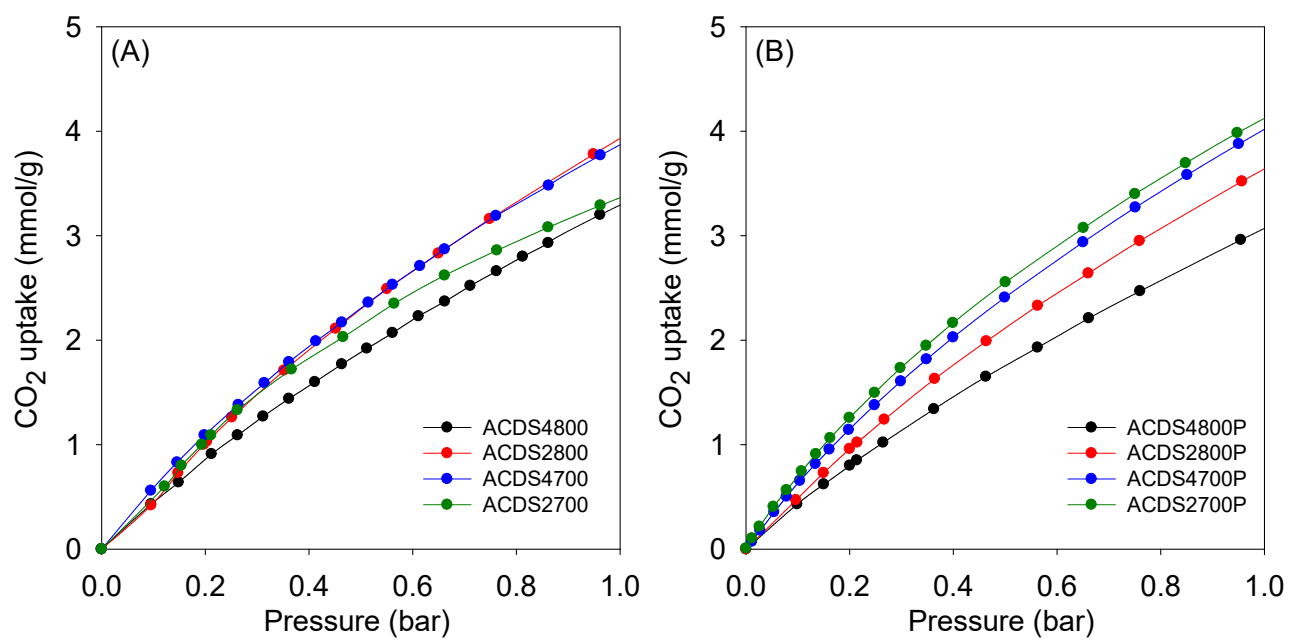

Figure S10. CO<sub>2</sub> uptake of KOH activated carbons derived from (A) powdered or (B) compacted ACDS carbon.
